# Supplementary material for: Understanding the compound flood risk along the coast of the contiguous United States
Source: Copernicus journal article supplement (doi:10.5194/hess-27-3911-2023), 2023-11-06
Supplement: Supplementary file 1 [file hess-27-3911-2023-supplement.pdf]

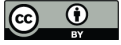

*Supplement of*

## **Understanding the compound flood risk along the coast of the contiguous United States**

**Dongyu Feng et al.**

*Correspondence to:* Zeli Tan (zeli.tan@pnnl.gov)

The copyright of individual parts of the supplement might differ from the article licence.

## Supplement

### Contents of this file

Tables S1  
Figures S1 to S8

### Introduction

This supporting material contains a table showing the information of paired USGS gauges and NOAA tidal gauges for uncertainty analysis (Table S1). We also provide ten figures including the MOSART streamflow validation (Fig. S1), GTSM water level validation (Fig. S2), numbers representing individual river basins (Fig. S3) and USGS and NOAA gauges (Fig. S4), and model-data comparison to identify potential CFRA uncertainties at example river basins in Figures S5-S9, and the spatial map of joint exceedance probability ( $P_{Q,SS}$ ) with magnified view at a few representative regions (Fig. S10).

### Model-data comparison

We provide a few example basins to demonstrate the various types of uncertainties (Fig. S5-S9). Figures S5~S6 show the epistemic uncertainty caused by inappropriate in-situ locations. In Figure S5, the streamflow measured at the tributary of a mainstem is much lower and cannot represent the river discharge at the outlet. In Figure S6,  $SS$  has a different probability distribution than that modeled at the river-ocean interface. Gauge 9419750, despite being close enough to the river outlets, is blocked by man-made barrier islands, thus presenting a different  $SS$  signal. Figures S7 show the aleatory uncertainty due to the variability in  $Q$  between the USGS gauge and the river outlet. While the probability distributions of  $Q$  and  $SS$  are similar among the three cases,  $Q$  at the upstream gauge typically yields smaller peaks in correspondence to the  $SS$  peaks, resulting in lower  $\tau$ . The epistemic uncertainties in Figures S8~S9 are caused by the GTSM and MOSART models, respectively. In both examples, the dependence between  $Q$  and  $SS$  is underestimated because GTSM and MOSART underestimate the peaks in  $SS$  and  $Q$ , respectively. In particular, the MOSART performance is poor in Figure S9, which yields a different  $Q$  distribution.

**Table S1. Paired USGS and NOAA gauges for uncertainty analysis.**

| <b>No.</b> | <b>USGS</b> | <b>Latitude and Longitude</b> | <b>NOAA</b> | <b>Latitude and Longitude</b> |
|------------|-------------|-------------------------------|-------------|-------------------------------|
| 1          | 01034500    | 45.2361, -68.6514             | 8413320     | 44.3922, -68.2043             |
| 2          | 01049265    | 44.4722, -69.6839             | 8418150     | 43.6581, -70.2442             |
| 3          | 01066000    | 43.8081, -70.7817             | 8418150     | 43.6581, -70.2442             |
| 4          | 01113895    | 41.8884, -71.3814             | 8452660     | 41.5050, -71.3267             |
| 5          | 01122500    | 41.7004, -72.1820             | 8461490     | 41.3614, -72.0900             |
| 6          | 01184000    | 41.9375, -72.6850             | 8461490     | 41.3614, -72.0900             |
| 7          | 01389500    | 40.8847, -74.2261             | 8518750     | 40.7006, -74.0142             |
| 8          | 01403060    | 40.5511, -74.5483             | 8531680     | 40.4669, -74.0094             |
| 9          | 01576754    | 39.9465, -76.3677             | 8574680     | 39.2667, -76.5783             |
| 10         | 02037500    | 37.5632, -77.5469             | 8638610     | 36.9467, -76.3300             |
| 11         | 02105769    | 34.4044, -78.2936             | 8658120     | 34.2275, -77.9536             |
| 12         | 02175000    | 33.0279, -80.3915             | 8665530     | 32.7808, -79.9236             |
| 13         | 02198500    | 32.5286, -81.2683             | 8670870     | 32.0367, -80.9017             |
| 14         | 02202500    | 32.1901, -81.4159             | 8670870     | 32.0367, -80.9017             |
| 15         | 02228000    | 31.1900, -81.9358             | 8720030     | 30.6714, -81.4658             |
| 16         | 02246025    | 30.0825, -81.8094             | 8720218     | 30.3982, -81.4279             |
| 17         | 02323592    | 29.3394, -83.0865             | 8727520     | 29.1350, -83.0317             |
| 18         | 02376033    | 30.6702, -87.2669             | 8729840     | 30.4044, -87.2112             |
| 19         | 08068500    | 30.1105, -95.4363             | 8771450     | 29.3100, -94.7933             |
| 20         | 08189500    | 28.2920, -97.2792             | 8774770     | 28.0217, -97.0467             |
| 21         | 11530500    | 41.4340, -123.9350            | 9419750     | 41.7450, -124.1830            |
| 22         | 11532500    | 41.7915, -124.0762            | 9419750     | 41.7450, -124.1830            |
| 23         | 12113000    | 47.3146, -122.0601            | 9449880     | 48.5453, -123.0129            |
| 24         | 12150800    | 47.8309, -122.0485            | 9449880     | 48.5453, -123.0129            |
| 25         | 12213100    | 48.8448, -122.5893            | 9449880     | 48.5453, -123.0129            |
| 26         | 14243000    | 46.2748, -122.9146            | 9439040     | 46.2073, -123.7683            |

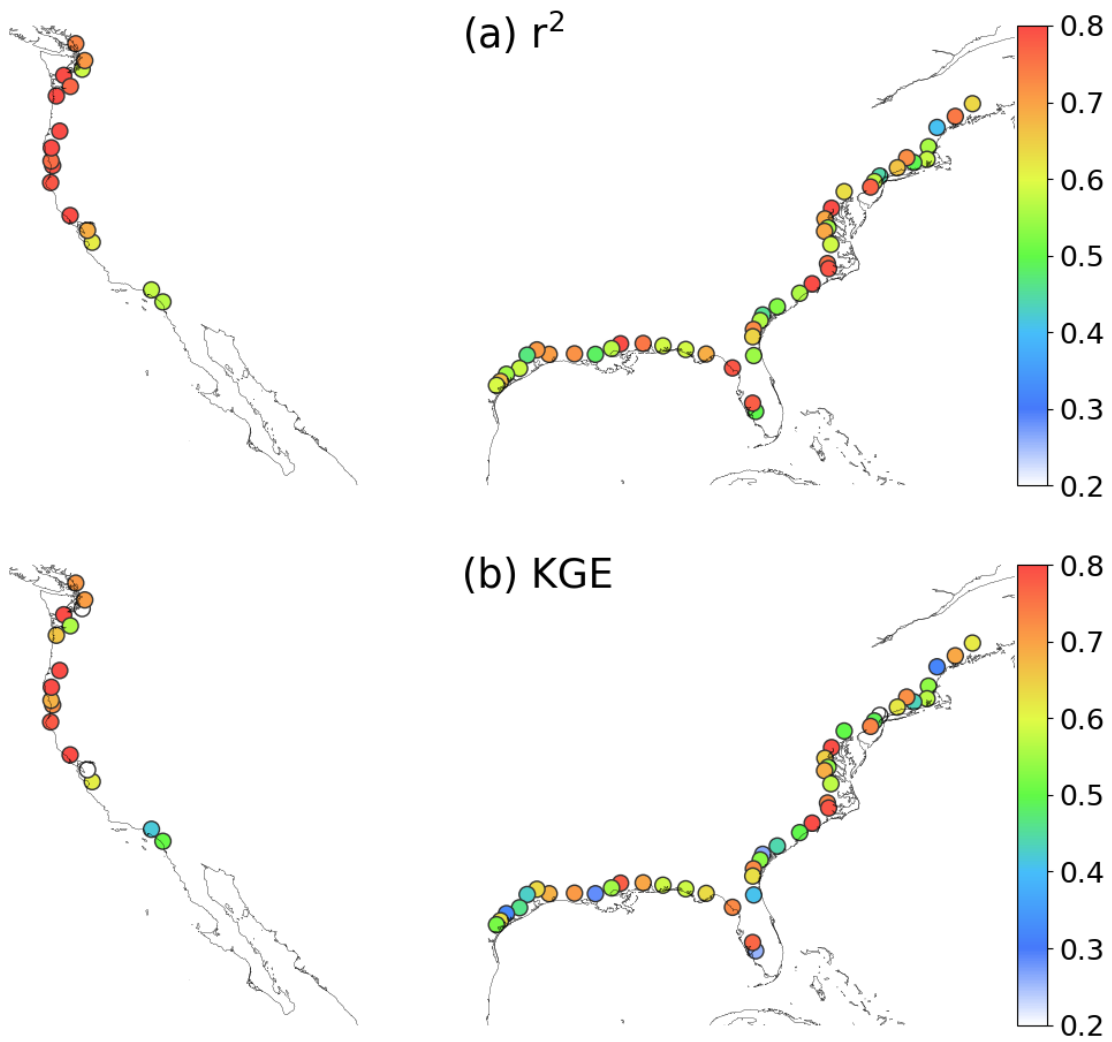

**Figure S1.** The evaluation of the MOSART simulated streamflow at the selected USGS gauges near the CONUS coastline using: (a) coefficient of determination  $r^2$ ; (b) Kling-Gupta efficiency (KGE) (Gupta et al., 2009).

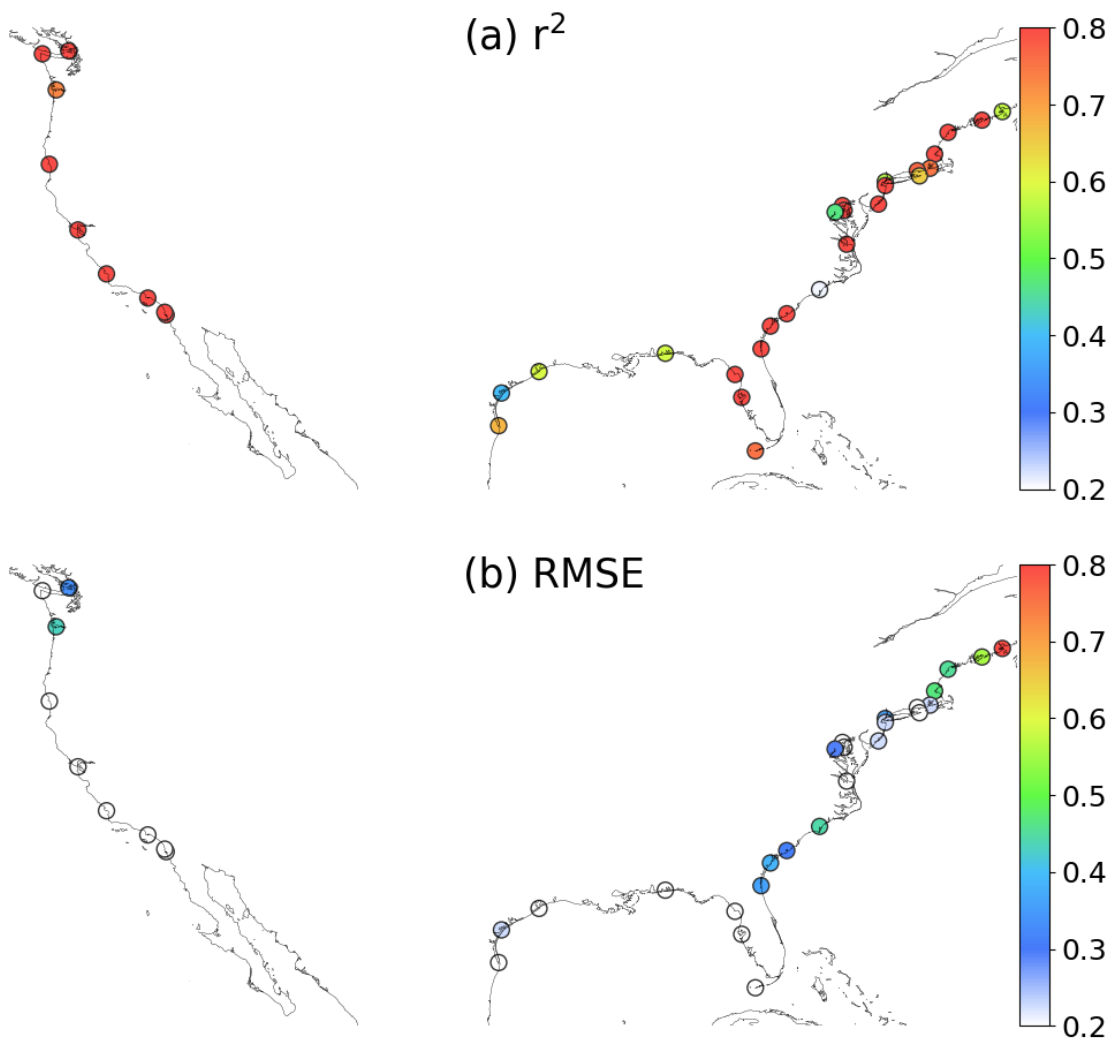

**Figure S2.** The evaluation of the GTSM modeled total water level at the selected NOAA tidal gauges near the US coastline using: (a) coefficient of determination  $r^2$ ; (b) root mean squared error (RMSE).

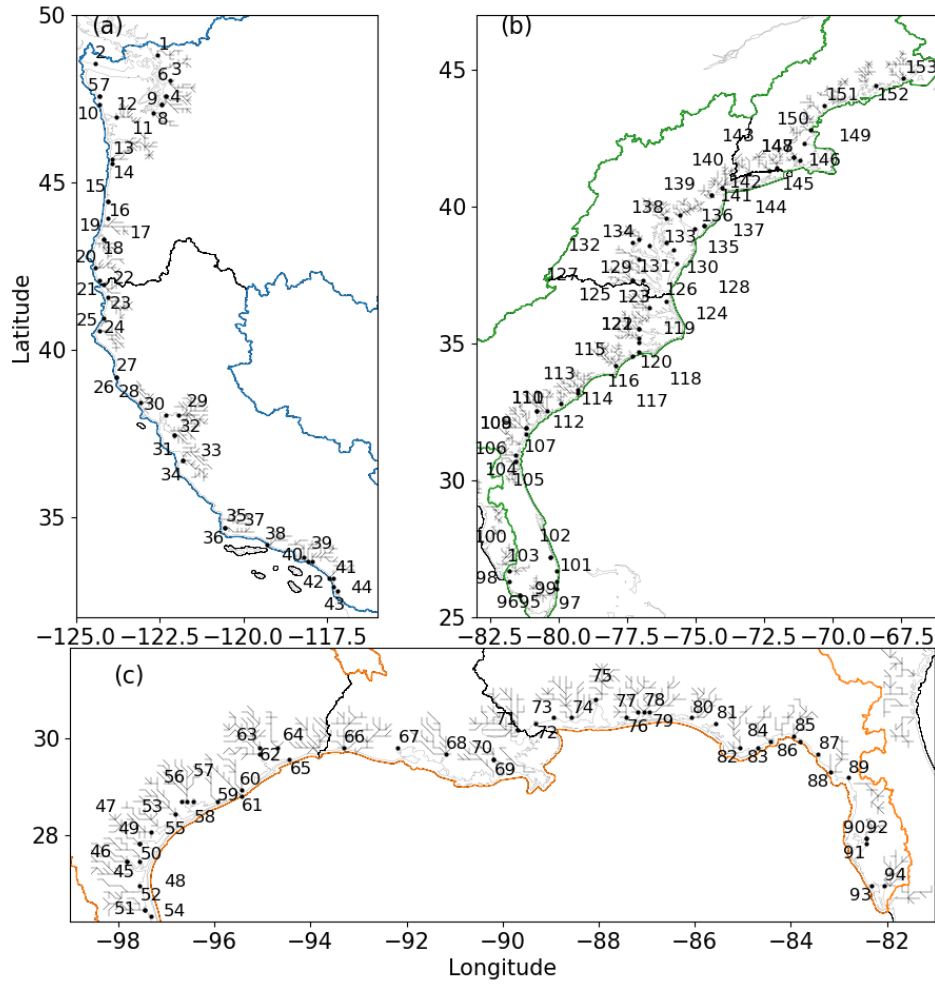

**Figure S3.** The numbers representing individual river basins corresponding to those in Figure 4.

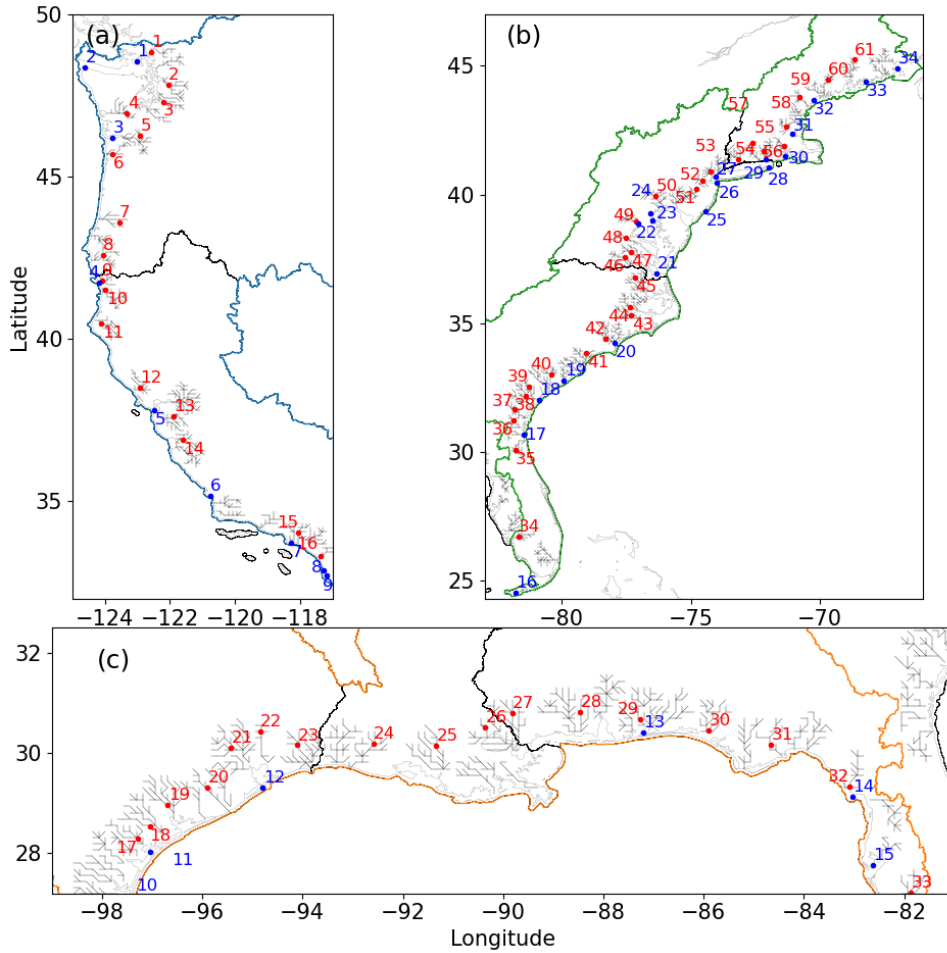

**Figure S4.** The numbers representing USGS gauges (red) and NOAA gauges (blue) corresponding to those in Figure 6.

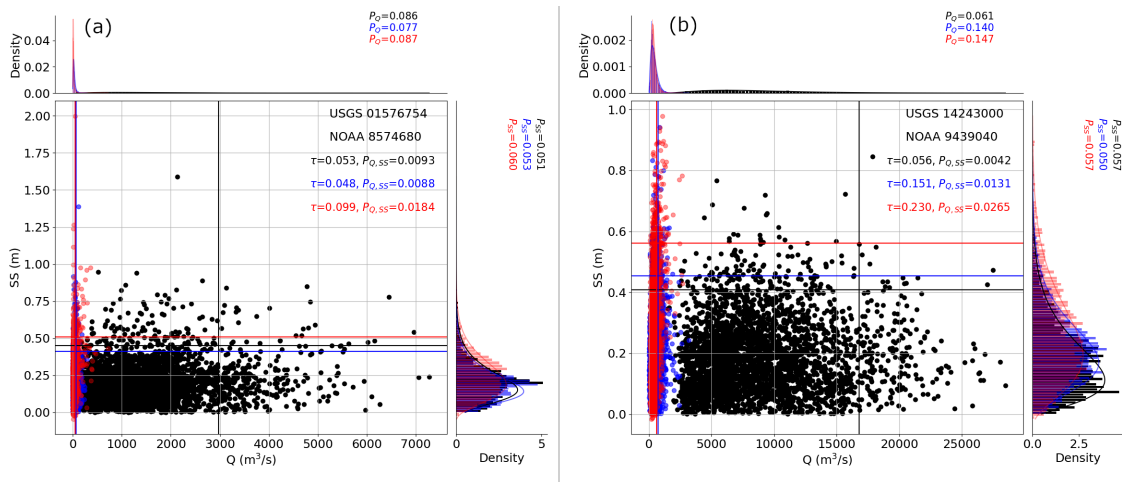

**Figure S5.** Epistemic uncertainty caused by the inappropriate USGS gauge locations. The uncertainty is identified by model-data comparison at the river basins corresponding to USGS gauge 01576754 and 14243000.

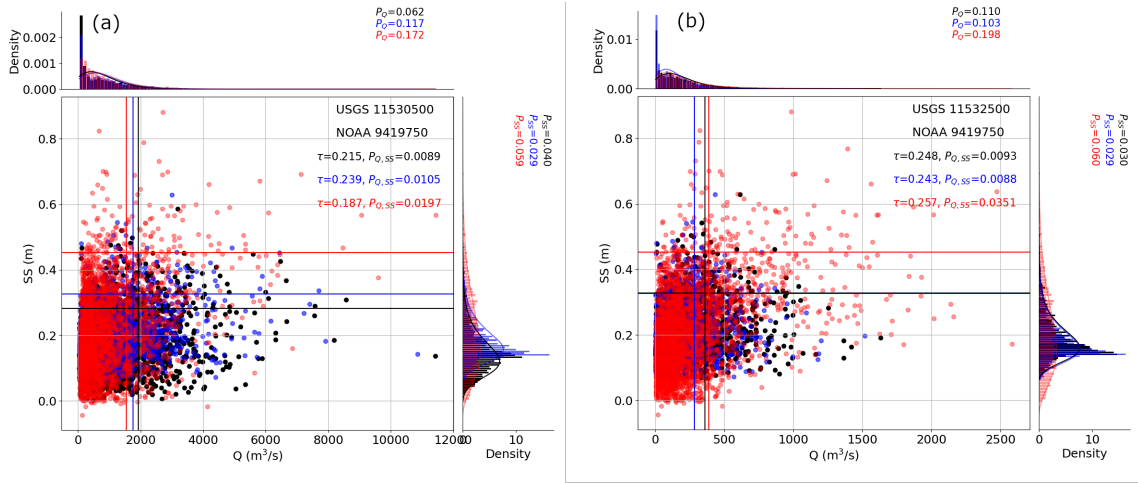

**Figure S6.** Epistemic uncertainty caused by the inappropriate NOAA gauge locations. The uncertainty is identified by model-data comparison at the river basins corresponding to USGS gauge 11530500 and 11532500.

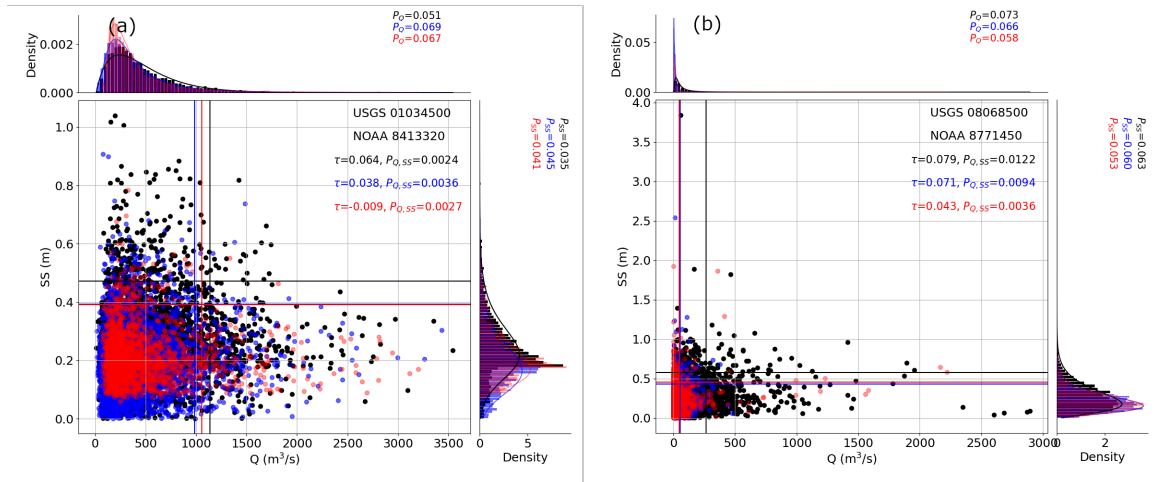

**Figure S7.** Aleatory uncertainty due to the variability in  $Q$ . The uncertainty is identified by model-data comparison at the river basins corresponding to USGS gauge 01034500 and 08068500.



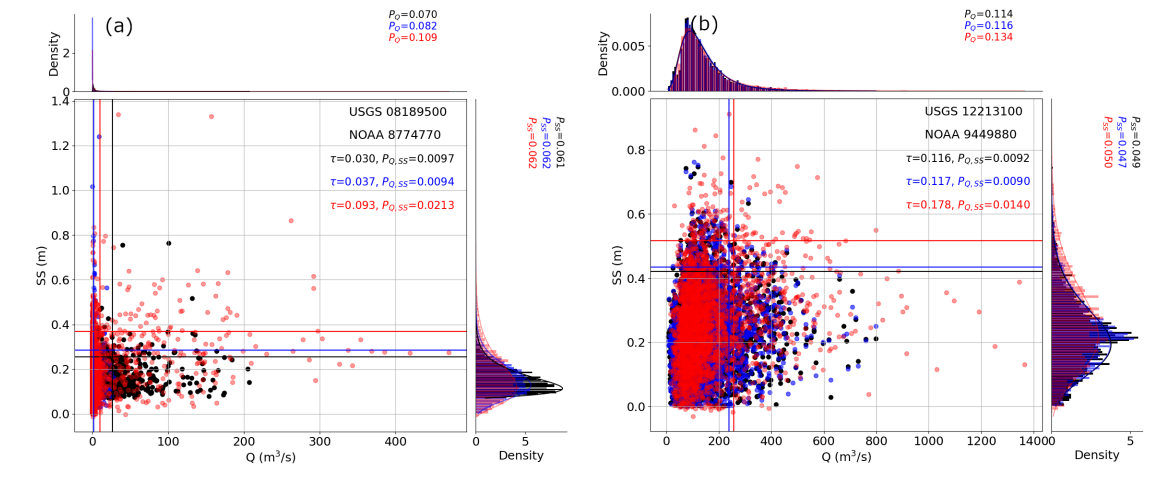

**Figure S8.** Epistemic uncertainty due to the underestimation of SS peaks in GTSM. The uncertainty is identified by model-data comparison at the river basins corresponding to USGS gauge 08189500 and 12213100.

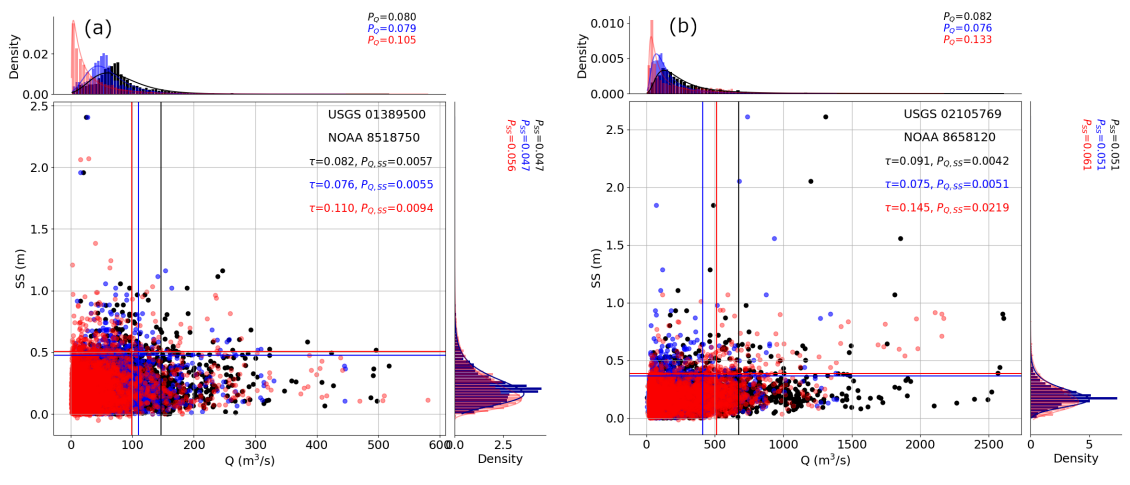

**Figure S9.** Epistemic uncertainty due to the reduced MOSART performance. The uncertainty is identified by model-data comparison at the river basins corresponding to USGS gauge 01389500 and 02105709.

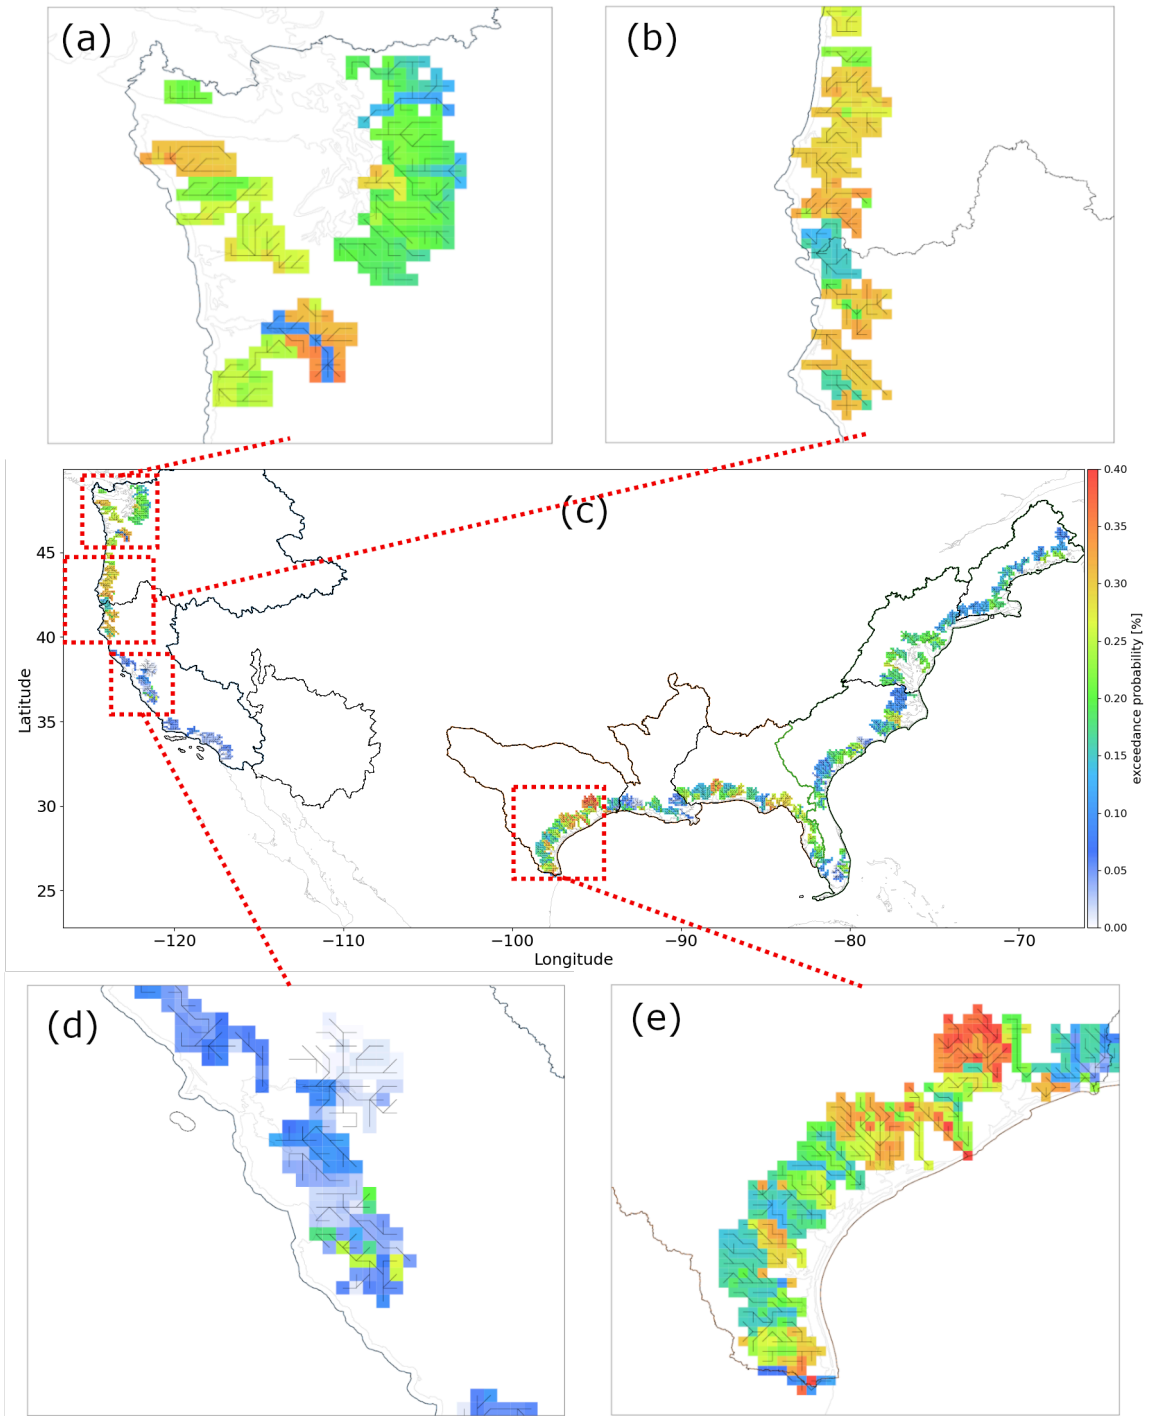

**Figure S10.** The joint exceedance probability ( $P_{Q,SS}$ ) in CONUS with magnified views at four representative regions where  $P_{Q,SS}$  is significantly different in the mainstem than its tributaries.

## **References**

Gupta, H. V., Kling, H., Yilmaz, K. K., and Martinez, G. F.: Decomposition of the mean squared error and NSE performance criteria: Implications for improving hydrological modelling, *Journal of hydrology*, 377, 80-91, 10.1016/j.jhydrol.2009.08.003, 2009.
